# Supplementary material for: Reactive Transport Modelling of the Long-Term Interaction between Carbon Steel and MX-80 Bentonite at 25 °C
Source: MDPI journal article supplement (doi:10.3390/min11111272), 2021-11-16
Supplement: s1 [file s1]

Article

# Reactive Transport Modelling of the Long-Term Interaction between Carbon Steel and MX-80 Bentonite at 25 °C

M. Carme Chaparro <sup>1,\*</sup>, Nicolas Finck <sup>1</sup>, Volker Metz <sup>1</sup> and Horst Geckeis <sup>1</sup>

<sup>1</sup> Karlsruhe Institute of Technology (KIT), Institute for Nuclear Waste Disposal (INE), P.O. Box 3640, 76021 Karlsruhe, Germany.

\* Correspondence: carme.chaparro@kit.edu

Received: 31 August 2021; Accepted: 7 November 2021; Published: 16 November 2021

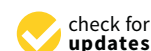

## Supplementary material

**Table S1.** Log K at 25 °C and stoichiometric coefficients of homogeneous reactions.

| Reaction                                       | log K   | Primary species  |                  |                 |                |                  |                 |                               |                               |                       |                                  |                     |                |                |
|------------------------------------------------|---------|------------------|------------------|-----------------|----------------|------------------|-----------------|-------------------------------|-------------------------------|-----------------------|----------------------------------|---------------------|----------------|----------------|
|                                                |         | Ca <sup>2+</sup> | Mg <sup>2+</sup> | Na <sup>+</sup> | K <sup>+</sup> | Fe <sup>2+</sup> | Cl <sup>-</sup> | HCO <sub>3</sub> <sup>-</sup> | SO <sub>4</sub> <sup>2-</sup> | SiO <sub>2</sub> (aq) | Al(OH) <sub>4</sub> <sup>-</sup> | O <sub>2</sub> (aq) | H <sup>+</sup> | X <sup>-</sup> |
| OH <sup>-</sup>                                | 13.9878 | 0                | 0                | 0               | 0              | 0                | 0               | 0                             | 0                             | 0                     | 0                                | 0                   | -1             | 0              |
| CO <sub>3</sub> <sup>2-</sup>                  | 10.3240 | 0                | 0                | 0               | 0              | 0                | 0               | 1                             | 0                             | 0                     | 0                                | 0                   | -1             | 0              |
| CaCO <sub>3</sub> (aq)                         | 7.0069  | 1                | 0                | 0               | 0              | 0                | 0               | 1                             | 0                             | 0                     | 0                                | 0                   | -1             | 0              |
| CaSO <sub>4</sub> (aq)                         | -2.1007 | 1                | 0                | 0               | 0              | 0                | 0               | 0                             | 1                             | 0                     | 0                                | 0                   | 0              | 0              |
| CaOH <sup>+</sup>                              | 12.8484 | 1                | 0                | 0               | 0              | 0                | 0               | 0                             | 0                             | 0                     | 0                                | 0                   | -1             | 0              |
| CaCl <sup>+</sup>                              | 0.7003  | 1                | 0                | 0               | 0              | 0                | 1               | 0                             | 0                             | 0                     | 0                                | 0                   | 0              | 0              |
| CaHCO <sub>3</sub> <sup>+</sup>                | -1.0430 | 1                | 0                | 0               | 0              | 0                | 0               | 1                             | 0                             | 0                     | 0                                | 0                   | 0              | 0              |
| CaCl <sub>2</sub> (aq)                         | 0.6538  | 1                | 0                | 0               | 0              | 0                | 2               | 0                             | 0                             | 0                     | 0                                | 0                   | 0              | 0              |
| CaH <sub>3</sub> SiO <sub>4</sub> <sup>+</sup> | 8.7916  | 1                | 0                | 0               | 0              | 0                | 0               | 0                             | 0                             | 1                     | 0                                | 0                   | -1             | 0              |
| MgCO <sub>3</sub> (aq)                         | 7.3548  | 0                | 1                | 0               | 0              | 0                | 0               | 1                             | 0                             | 0                     | 0                                | 0                   | -1             | 0              |
| MgHCO <sub>3</sub> <sup>+</sup>                | -1.0330 | 0                | 1                | 0               | 0              | 0                | 0               | 1                             | 0                             | 0                     | 0                                | 0                   | 0              | 0              |
| MgSO <sub>4</sub> (aq)                         | -2.3833 | 0                | 1                | 0               | 0              | 0                | 0               | 0                             | 1                             | 0                     | 0                                | 0                   | 0              | 0              |
| MgOH <sup>+</sup>                              | 11.7778 | 0                | 1                | 0               | 0              | 0                | 0               | 0                             | 0                             | 0                     | 0                                | 0                   | -1             | 0              |
| MgCl <sup>+</sup>                              | 0.1387  | 0                | 1                | 0               | 0              | 0                | 1               | 0                             | 0                             | 0                     | 0                                | 0                   | 0              | 0              |
| MgH <sub>3</sub> SiO <sub>4</sub> <sup>+</sup> | 8.5416  | 0                | 1                | 0               | 0              | 0                | 0               | 0                             | 0                             | 1                     | 0                                | 0                   | -1             | 0              |
| NaOH(aq)                                       | 14.7955 | 0                | 0                | 1               | 0              | 0                | 0               | 0                             | 0                             | 0                     | 0                                | 0                   | -1             | 0              |
| NaCO <sub>3</sub> <sup>-</sup>                 | 9.8160  | 0                | 0                | 1               | 0              | 0                | 0               | 1                             | 0                             | 0                     | 0                                | 0                   | -1             | 0              |
| NaHCO <sub>3</sub> (aq)                        | -0.1549 | 0                | 0                | 1               | 0              | 0                | 0               | 1                             | 0                             | 0                     | 0                                | 0                   | 0              | 0              |
| NaCl(aq)                                       | 0.7818  | 0                | 0                | 1               | 0              | 0                | 1               | 0                             | 0                             | 0                     | 0                                | 0                   | 0              | 0              |
| NaSO <sub>4</sub> <sup>-</sup>                 | -0.8120 | 0                | 0                | 1               | 0              | 0                | 0               | 0                             | 1                             | 0                     | 0                                | 0                   | 0              | 0              |
| CO <sub>2</sub> (aq)                           | -6.3409 | 0                | 0                | 0               | 0              | 0                | 0               | 1                             | 0                             | 0                     | 0                                | 0                   | 1              | 0              |

**Table S2.** Log K at 25 °C and stoichiometric coefficients of homogeneous reactions.

| Reaction                                        | log K    | Primary species  |                  |                 |                |                  |                 |                               |                               |                       |                                  |                     |                |                |
|-------------------------------------------------|----------|------------------|------------------|-----------------|----------------|------------------|-----------------|-------------------------------|-------------------------------|-----------------------|----------------------------------|---------------------|----------------|----------------|
|                                                 |          | Ca <sup>2+</sup> | Mg <sup>2+</sup> | Na <sup>+</sup> | K <sup>+</sup> | Fe <sup>2+</sup> | Cl <sup>-</sup> | HCO <sub>3</sub> <sup>-</sup> | SO <sub>4</sub> <sup>2-</sup> | SiO <sub>2</sub> (aq) | Al(OH) <sub>4</sub> <sup>-</sup> | O <sub>2</sub> (aq) | H <sup>+</sup> | X <sup>-</sup> |
| Fe <sup>3+</sup>                                | -8.4837  | 0                | 0                | 0               | 0              | 1                | 0               | 0                             | 0                             | 0                     | 0                                | 0.25                | 1              | 0              |
| FeHCO <sup>3+</sup>                             | -2.0423  | 0                | 0                | 0               | 0              | 1                | 0               | 1                             | 0                             | 0                     | 0                                | 0                   | 0              | 0              |
| FeCO <sub>3</sub> (aq)                          | 5.5306   | 0                | 0                | 0               | 0              | 1                | 0               | 1                             | 0                             | 0                     | 0                                | 0                   | -1             | 0              |
| FeCl <sup>+</sup>                               | 0.1648   | 0                | 0                | 0               | 0              | 1                | 1               | 0                             | 0                             | 0                     | 0                                | 0                   | 0              | 0              |
| FeCl <sup>2+</sup>                              | -7.6712  | 0                | 0                | 0               | 0              | 1                | 1               | 0                             | 0                             | 0                     | 0                                | 0.25                | 1              | 0              |
| FeCl <sub>2</sub> (aq)                          | 2.4632   | 0                | 0                | 0               | 0              | 1                | 2               | 0                             | 0                             | 0                     | 0                                | 0                   | 0              | 0              |
| FeOH <sup>+</sup>                               | 9.6327   | 0                | 0                | 0               | 0              | 1                | 0               | 0                             | 0                             | 0                     | 0                                | 0                   | -1             | 0              |
| FeOH <sup>2+</sup>                              | -6.2937  | 0                | 0                | 0               | 0              | 1                | 0               | 0                             | 0                             | 0                     | 0                                | 0.25                | 0              | 0              |
| Fe(OH) <sub>2</sub> (aq)                        | 20.5884  | 0                | 0                | 0               | 0              | 1                | 0               | 0                             | 0                             | 0                     | 0                                | 0                   | -2             | 0              |
| Fe(OH) <sub>3</sub> (aq)                        | 3.6487   | 0                | 0                | 0               | 0              | 1                | 0               | 0                             | 0                             | 0                     | 0                                | 0.25                | -2             | 0              |
| Fe(OH) <sub>4</sub> <sup>-</sup>                | 13.1166  | 0                | 0                | 0               | 0              | 1                | 0               | 0                             | 0                             | 0                     | 0                                | 0.25                | -3             | 0              |
| Fe(OH) <sub>2</sub> <sup>+</sup>                | -2.5888  | 0                | 0                | 0               | 0              | 1                | 0               | 0                             | 0                             | 0                     | 0                                | 0.25                | -1             | 0              |
| Fe(SO <sub>4</sub> ) <sub>2</sub> <sup>-</sup>  | -11.7305 | 0                | 0                | 0               | 0              | 1                | 0               | 0                             | 2                             | 0                     | 0                                | 0.25                | 1              | 0              |
| FeSO <sub>4</sub> (aq)                          | -2.1894  | 0                | 0                | 0               | 0              | 1                | 0               | 0                             | 1                             | 0                     | 0                                | 0                   | 0              | 0              |
| Fe <sub>2</sub> (OH) <sub>2</sub> <sup>4+</sup> | -14.0174 | 0                | 0                | 0               | 0              | 2                | 0               | 0                             | 0                             | 0                     | 0                                | 0.5                 | 0              | 0              |
| KOH(aq)                                         | 14.4600  | 0                | 0                | 0               | 1              | 0                | 0               | 0                             | 0                             | 0                     | 0                                | 0                   | -1             | 0              |
| KSO <sub>4</sub> <sup>-</sup>                   | -0.8752  | 0                | 0                | 0               | 1              | 0                | 0               | 0                             | 1                             | 0                     | 0                                | 0                   | 0              | 0              |
| KCl(aq)                                         | 1.4995   | 0                | 0                | 0               | 1              | 0                | 1               | 0                             | 0                             | 0                     | 0                                | 0                   | 0              | 0              |
| HSO <sub>4</sub> <sup>-</sup>                   | -1.9767  | 0                | 0                | 0               | 0              | 0                | 0               | 0                             | 1                             | 0                     | 0                                | 0                   | 1              | 0              |
| HS <sup>-</sup>                                 | 138.2709 | 0                | 0                | 0               | 0              | 0                | 0               | 0                             | 1                             | 0                     | 0                                | -2                  | 1              | 0              |
| AlOH <sup>2+</sup>                              | -11.5489 | 0                | 0                | 0               | 0              | 0                | 0               | 0                             | 0                             | 0                     | 1                                | 0                   | 2              | 0              |
| Al(OH) <sub>3</sub> (aq)                        | -5.9897  | 0                | 0                | 0               | 0              | 0                | 0               | 0                             | 0                             | 0                     | 1                                | 0                   | 1              | 0              |
| Al(OH) <sub>2</sub> <sup>+</sup>                | -17.1837 | 0                | 0                | 0               | 0              | 0                | 0               | 0                             | 0                             | 0                     | 1                                | 0                   | 3              | 0              |
| Al <sup>3+</sup>                                | -22.1372 | 0                | 0                | 0               | 0              | 0                | 0               | 0                             | 0                             | 0                     | 1                                | 0                   | 4              | 0              |

**Table S3.** Log K at 25 °C and stoichiometric coefficients of mineral reactions.

| Reaction        | log K    | Primary species  |                  |                 |                |                  |                 |                               |                               |                       |                                  |                     |                |                |
|-----------------|----------|------------------|------------------|-----------------|----------------|------------------|-----------------|-------------------------------|-------------------------------|-----------------------|----------------------------------|---------------------|----------------|----------------|
|                 |          | Ca <sup>2+</sup> | Mg <sup>2+</sup> | Na <sup>+</sup> | K <sup>+</sup> | Fe <sup>2+</sup> | Cl <sup>-</sup> | HCO <sub>3</sub> <sup>-</sup> | SO <sub>4</sub> <sup>2-</sup> | SiO <sub>2</sub> (aq) | Al(OH) <sub>4</sub> <sup>-</sup> | O <sub>2</sub> (aq) | H <sup>+</sup> | X <sup>-</sup> |
| Iron            | 59.0116  | 0                | 0                | 0               | 0              | 1                | 0               | 0                             | 0                             | 0                     | 0                                | -0.5                | -2             | 0              |
| Montmorillonite | -18.0198 | 0.02             | 0.9              | 0.15            | 0.2            | 0.45             | 0               | 0                             | 0                             | 3.75                  | 1.25                             | 0.04                | -1.84          | 0              |
| Quartz          | -4.0037  | 0                | 0                | 0               | 0              | 0                | 0               | 0                             | 0                             | 1                     | 0                                | 0                   | 0              | 0              |
| Calcite         | 1.8527   | 1                | 0                | 0               | 0              | 0                | 0               | 1                             | 0                             | 0                     | 0                                | 0                   | -1             | 0              |
| Illite          | -41.9211 | 0                | 0.25             | 0               | 0.6            | 0                | 0               | 0                             | 0                             | 3.5                   | 2.3                              | 0                   | 1.2            | 0              |
| Pyrite          | 217.3379 | 0                | 0                | 0               | 0              | 1                | 0               | 0                             | 2                             | 0                     | 0                                | -3.5                | 2              | 0              |
| Muscovite       | -52.8588 | 0                | 0                | 0               | 1              | 0                | 0               | 0                             | 0                             | 3                     | 3                                | 0                   | 2              | 0              |
| Albite          | -19.3942 | 0                | 0                | 1               | 0              | 0                | 0               | 0                             | 0                             | 3                     | 1                                | 0                   | 0              | 0              |
| Magnetite       | -6.5069  | 0                | 0                | 0               | 0              | 3                | 0               | 0                             | 0                             | 0                     | 0                                | 0.5                 | -6             | 0              |
| Siderite        | -0.1888  | 0                | 0                | 0               | 0              | 1                | 0               | 1                             | 0                             | 0                     | 0                                | 0                   | -1             | 0              |
| Nontronite-Na   | -35.8238 | 0                | 0                | 0.33            | 0              | 2                | 0               | 0                             | 0                             | 3.67                  | 0.33                             | 0.5                 | -4             | 0              |
| Nontronite-Mg   | -35.9180 | 0                | 0.165            | 0               | 0              | 2                | 0               | 0                             | 0                             | 3.67                  | 0.33                             | 0.5                 | -4             | 0              |
| Cronstedtite    | -0.7260  | 0                | 0                | 0               | 0              | 4                | 0               | 0                             | 0                             | 1                     | 0                                | 0.5                 | -8             | 0              |
| Greenalite      | 22.6499  | 0                | 0                | 0               | 0              | 3                | 0               | 0                             | 0                             | 2                     | 0                                | 0                   | -6             | 0              |

**Table S4.** Log K at 25 °C and stoichiometric coefficients of cation exchange reactions.

| Reaction | log K | Primary species  |                  |                 |                |                  |                 |                               |                               |                       |                                  |                     |                |                |
|----------|-------|------------------|------------------|-----------------|----------------|------------------|-----------------|-------------------------------|-------------------------------|-----------------------|----------------------------------|---------------------|----------------|----------------|
|          |       | Ca <sup>2+</sup> | Mg <sup>2+</sup> | Na <sup>+</sup> | K <sup>+</sup> | Fe <sup>2+</sup> | Cl <sup>-</sup> | HCO <sub>3</sub> <sup>-</sup> | SO <sub>4</sub> <sup>2-</sup> | SiO <sub>2</sub> (aq) | Al(OH) <sub>4</sub> <sup>-</sup> | O <sub>2</sub> (aq) | H <sup>+</sup> | X <sup>-</sup> |
| X-Na     | 0.0   | 0                | 0                | 1               | 0              | 0                | 0               | 0                             | 0                             | 0                     | 0                                | 0                   | 0              | 1              |
| X-K      | -0.7  | 0                | 0                | 0               | 1              | 0                | 0               | 0                             | 0                             | 0                     | 0                                | 0                   | 0              | 1              |
| X2-Ca    | -0.8  | 1                | 0                | 0               | 0              | 0                | 0               | 0                             | 0                             | 0                     | 0                                | 0                   | 0              | 2              |
| X2-Mg    | -0.6  | 0                | 1                | 0               | 0              | 0                | 0               | 0                             | 0                             | 0                     | 0                                | 0                   | 0              | 2              |
| X2-Fe    | -0.5  | 0                | 0                | 0               | 0              | 1                | 0               | 0                             | 0                             | 0                     | 0                                | 0                   | 0              | 2              |

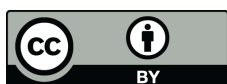

© 2021 by the authors. Licensee MDPI, Basel, Switzerland. This article is an open access article distributed under the terms and conditions of the Creative Commons Attribution (CC BY) license (<http://creativecommons.org/licenses/by/4.0/>).
